# Supplementary material
Source: HighWire-hosted journal article supplement (https://rc.rcjournal.com/highwire/filestream/22878/field_highwire_adjunct_files/0/rc-09703-File002.docx)
Supplement: rc-09703-File002.docx [file rc-09703-File002.docx]

| Nebulizer | Gas Source | Viral Filter | Respirable  Fraction (%) | Dose Delivered  1 min | Dose  Delivered  5 min |
| --- | --- | --- | --- | --- | --- |
| Hudson MicroMist | Ombra | No | 68.8 | 2.5  10.1  40.7  162.9  651.7  **868.0** | 1.2  5.0  20.0  79.9  319.4  **425.5** |
|  |  | Yes |  | 2.9  11.4  45.7  182.8  731.3  **974.0** | 2.1  8.4  33.8  135.2  540.9  **720.5** |
| AeroEclipse II BAN | Ombra | No | 76.0 | 1.8  7.4  29.5  118.0  471.8  **628.5** | 2.7  10.9  43.8  175.1  700.7  **933.3** |
|  |  | Yes |  | 2.4  9.6  38.4  153.5  614.1  **818.0** | 2.3  9.3  37.0  148.1  592.6  **789.3** |

**Supplemental Table 1:** Comparing methacholine dose delivery with 1 versus 5 minutes of tidal breathing between Ombra-powered nebulizers with and without viral filter placement on the nebulizer exhalation limb (using VT 500 mL, *f* of 15 per minute, sinusoidal pattern).
